# Supplementary material
Source: PubMed Central journal article supplement (PMC7674121)
Supplement: mmc1.pdf [file mmc1.pdf]

Table S1. Excluded studies by duplicate cases

| Author                          | Reference | Journal                                                    | Country | City         | Data source                                                                                                                        | Number of women | Period of admission ("recruitment") | Date of publication | Title of publication                                                                                                                                              |
|---------------------------------|-----------|------------------------------------------------------------|---------|--------------|------------------------------------------------------------------------------------------------------------------------------------|-----------------|-------------------------------------|---------------------|-------------------------------------------------------------------------------------------------------------------------------------------------------------------|
| <b>Duplicate cases of China</b> |           |                                                            |         |              |                                                                                                                                    |                 |                                     |                     |                                                                                                                                                                   |
| Liu W <i>et al.</i>             | 49        | PrePrints                                                  | China   | Wuhan        | Tongji Hospital, Tongji Medical College, Huazhong University of Science and Technology                                             | 3               | 02/02/2020-13/02/2020               | 2/25/20             | Coronavirus disease 2019 (COVID-19) during pregnancy: a case series                                                                                               |
| Wang S <i>et al.</i>            | 50        | Clinical Infectious Diseases                               | China   | Wuhan        | Tongji Hospital, Tongji Medical College, Huazhong University of Science and Technology                                             | 1               | 2/1/20                              | 3/12/20             | A Case Report of Neonatal 2019 Coronavirus Disease in China                                                                                                       |
| Yu N <i>et al.</i>              | 51        | The Lancet Infectious Diseases                             | China   | Wuhan        | Tongji Hospital, Tongji Medical College, Huazhong University of Science and Technology                                             | 7               | 01/01/2020 - 08/02/2020             | 3/24/20             | Clinical features and obstetric and neonatal outcomes of pregnant patients with COVID-19 in Wuhan, China: a retrospective, single-centre, descriptive study       |
| Yu N <i>et al.</i>              | 52        | Progress in Modern Obstetrics and Gynecology               | China   | Wuhan        | Tongji Hospital, Tongji Medical College, Huazhong University of Science and Technology                                             | 23              | 01/01/2020 - 18/02/2020             | 3/5/20              | The perinatal outcome of late pregnancy complicated with new coronary pneumonia                                                                                   |
| Yu N <i>et al.</i>              | 53        | Lancet                                                     | China   | Wuhan        | Tongji Hospital, Tongji Medical College, Huazhong University of Science and Technology                                             | 2               | 01/01/2020 - 08/02/2020             | 4/22/20             | No SARS-CoV-2 detected in amniotic fluid in mid-pregnancy                                                                                                         |
| Liu W <i>et al.</i>             | 54        | Frontiers of Medicine                                      | China   | Wuhan        | Tongji Hospital, Tongji Medical College, Huazhong University of Science and Technology                                             | 10              | 31/01/2020 to 29/02/2020            | 4/13/20             | Clinical characteristics of 19 neonates born to mothers with COVID-19                                                                                             |
| Chen B <i>et al.</i>            | 55        | Canadian Journal of Anesthesia                             | China   | Wuhan        | Renmin Hospital of Wuhan University                                                                                                | 17              | 30/01/2020 - 23/02/2020             | 3/16/20             | Safety and efficacy of different anesthetic regimens for parturients with COVID-19 undergoing Cesarean delivery: a case series of 17 patients                     |
| Khan S <i>et al.</i>            | 56        | Infection Control and Hospital Epidemiology                | China   | Wuhan        | Renmin Hospital of Wuhan University                                                                                                | 3               | 28/01/2020 - 01/03/2020             | 3/19/20             | Impact of COVID-19 infection on pregnancy outcomes and the risk of maternal-to-neonatal intrapartum transmission of COVID-19 during natural birth                 |
| Fan <i>et al.</i>               | 57        | Clinical Infectious Diseases                               | China   | Wuhan        | Renmin Hospital of Wuhan University                                                                                                | 2               | 25/1/2020 and 26/01/2020            | 3/17/20             | Perinatal Transmission of COVID-19 Associated SARS-CoV-2: Should We Worry?                                                                                        |
| Khan S <i>et al.</i>            | 58        | Clinical Microbiology and Infection                        | China   | Wuhan        | Renmin Hospital of Wuhan University                                                                                                | 17              | 25/01/2020 to 15/02/2020            | 4/8/20              | Association of COVID-19 infection with pregnancy outcomes in healthcare workers and general women                                                                 |
| Chen S <i>et al.</i>            | 59        | Journal of Medical Virology                                | China   | Wuhan        | Maternal and Child Health Hospital of Hubei Province, Tongji Medical College, Huazhong University of Science and Technology, Wuhan | 5               | 20/01/2020 to 10/02/2020            | 3/28/20             | Clinical analysis of pregnant women with 2019 novel coronavirus pneumonia                                                                                         |
| Yang H <i>et al.</i>            | 60        | Journal of Infection                                       | China   | Wuhan        | Maternal and Child Health Hospital of Hubei Province, Tongji Medical College, Huazhong University of Science and Technology, Wuhan | 13              | 20/01/2020 to 05/03/2020            | 4/20/20             | Clinical features and outcomes of pregnant women suspected of coronavirus disease 2019                                                                            |
| Wu C <i>et al.</i>              | 61        | Virologica Sinica                                          | China   | Wuhan        | Maternal and Child Health Hospital of Hubei Province, Tongji Medical College, Huazhong University of Science and Technology, Wuhan | 8               | 23/01/2020 to 10/02/2020            | 4/20/20             | Clinical Manifestation and Laboratory Characteristics of SARS-CoV-2 Infection in Pregnant Women                                                                   |
| Chen S <i>et al.</i>            | 62        | Zhonghua Bing Li Xue Za Zhi (Chinese Journal of Pathology) | China   | Wuhan        | Union Hospital, Tongji Medical College, Huazhong University of Science and Technology                                              | 2               | 21/01/2020 to 04/02/2020            | 3/3/20              | Pregnant women with new coronavirus infection: a clinical characteristics and placental pathological analysis of three cases                                      |
| Chen Y <i>et al.</i>            | 63        | Frontiers in Pediatrics                                    | China   | Wuhan        | Union Hospital, Tongji Medical College, Huazhong University of Science and Technology                                              | 4               | -                                   | 2/28/20             | Infants Born to Mothers with a New Coronavirus (COVID-19)                                                                                                         |
| Liu D <i>et al.</i>             | 64        | American Journal of Roentgenology                          | China   | Wuhan        | Union Hospital, Tongji Medical College, Huazhong University of Science and Technology                                              | 15              | 20/01/2020 - 10/02/2020             | 3/19/20             | Pregnancy and Perinatal Outcomes of Women With Coronavirus Disease (COVID-19) Pneumonia: A Preliminary Analysis                                                   |
| Chen H <i>et al.</i>            | 65        | Lancet                                                     | China   | Wuhan        | Zhongnan Hospital of Wuhan University                                                                                              | 9               | 20/01/2020 to 31/01/2020            | 3/7/20              | Clinical characteristics and intrauterine vertical transmission potential of COVID-19 infection in nine pregnant women: a retrospective review of medical records |
| Yang P <i>et al.</i>            | 66        | Journal of Clinical Virology                               | China   | Wuhan        | Zhongnan Hospital of Wuhan University                                                                                              | 7               | 20/01/2020 to 29/01/2020            | 4/10/20             | Clinical characteristics and risk assessment of newborns born to mothers with COVID-19                                                                            |
| Huang J-w                       | 67        | Journal of Zhejiang University-SCIENCE B                   | China   | Hangzhou     | The First Affiliated Hospital, College of Medicine, Zhejiang University                                                            | 1               | 2/6/20                              | 4/1/20              | Dialectical behavior therapy-based psychological intervention for woman in late pregnancy and early postpartum suffering from COVID-19: a case report             |
| Li Y <i>et al.</i>              | 68        | Emerging Infectious Diseases                               | China   | Hangzhou     | The First Affiliated Hospital, College of Medicine, Zhejiang University                                                            | 1               | 2/6/20                              | 3/6/20              | Lack of Vertical Transmission of Severe Acute Respiratory Syndrome Coronavirus 2, China                                                                           |
| Kang X <i>et al.</i>            | 69        | Journal of Zhejiang University (Medical Edition)           | China   | Hangzhou     | The First Affiliated Hospital, College of Medicine, Zhejiang University                                                            | 1               | 2/6/20                              | 3/14/20             | 2019 Coronary Virus Disease (COVID-19) A Case of Cesarean Section Anesthesia for Pregnant Women                                                                   |
| Wu X <i>et al.</i>              | 70        | International Journal of Gynecology & Obstetrics           | China   | Wuhan        | The Central Hospital of Wuhan                                                                                                      | 23              | 31/12/2019 - 07/03/2020             | 4/8/20              | Radiological findings and clinical characteristics of pregnant women with COVID-19 pneumonia                                                                      |
| Xia H <i>et al.</i>             | 71        | British Journal of Anaesthesia                             | China   | Wuhan        | Wuhan Red Cross Hospital                                                                                                           | 1               | 20/01/2020 - 24-01/2020             | 3/17/20             | Emergency Caesarean delivery in a patient with confirmed coronavirus disease 2019 under spinal anaesthesia.                                                       |
| Chen L <i>et al.</i>            | 72        | New England Journal of Medicine                            | China   | Wuhan        | Multicentric                                                                                                                       | 84              | December 8, 2019, to March          | 4/17/20             | Clinical Characteristics of Pregnant Women with Covid-19 in Wuhan, China                                                                                          |
| Liu Y <i>et al.</i>             | 73        | Journal of Infection                                       | China   | multi cities | Multicentric                                                                                                                       | 13              | 08/12/2019 to 25/02/2020            | 3/5/20              | Clinical manifestations and outcome of SARS-CoV-2 infection during pregnancy                                                                                      |
| Zhu <i>et al.</i>               | 74        | Translational Pediatrics                                   | China   | Wuhan, TX    | Multicentric                                                                                                                       | 8               | 20/01/2020 to 5/02/2020             | 3/11/20             | Clinical analysis of 10 neonates born to mothers with 2019-nCoV pneumonia                                                                                         |
| <b>Duplicate cases of USA</b>   |           |                                                            |         |              |                                                                                                                                    |                 |                                     |                     |                                                                                                                                                                   |
| Breslin <i>et al.</i>           | 75        | American Journal of Obstetrics and Gynecology              | USA     | New York     | Columbia University Irving Medical Center                                                                                          | 7               | 3/18/20                             | 3/27/20             | COVID-19 in pregnancy: early lessons                                                                                                                              |
| Sutton <i>et al.</i>            | 76        | New England Journal of Medicine                            | USA     | New York     | New York-Presbyterian Allen Hospital and Columbia University Irving Medical Center.                                                | 1               | 22/03/2020 - 04/04/2020             | 4/13/20             | Universal Screening for SARS-CoV-2 in Women Admitted for Delivery                                                                                                 |

Table S2. General characteristics of included studies

| First author                      | Journal                                                                                                                                                                                                                                              | Country     | City          | Study type          | Number of patient | Date of publication | Reference |
|-----------------------------------|------------------------------------------------------------------------------------------------------------------------------------------------------------------------------------------------------------------------------------------------------|-------------|---------------|---------------------|-------------------|---------------------|-----------|
| Wang X <i>et al.</i>              | Clinical Infectious Diseases                                                                                                                                                                                                                         | China       | Suzhou        | Case report         | 1                 | 2/28/20             | 26        |
| Zhang L <i>et al.</i>             | Chinese Journal of Obstetrics and Gynecology                                                                                                                                                                                                         | China       | Wuhan         | Case-control        | 16                | 3/9/20              | 13        |
| Li N <i>et al.</i>                | Clinical Infectious Diseases                                                                                                                                                                                                                         | China       | Wuhan         | Case-control        | 16                | 3/13/20             | 14        |
| Wen Q <i>et al.</i>               | Journal of Microbiology, Immunology and Infection                                                                                                                                                                                                    | China       | Qingdao       | Case report         | 1                 | 3/17/20             | 27        |
| Chen X <i>et al.</i>              | Journal of Zhejiang University (Medical Edition)                                                                                                                                                                                                     | China       | Hangzhou      | Case series         | 3                 | 3/19/20             | 32        |
| Liu H <i>et al.</i>               | Journal of Infection                                                                                                                                                                                                                                 | China       | Wuhan         | Case-control        | 16                | 3/21/20             | 15        |
| Zambrano L <i>et al.</i>          | Travel Medicine and Infectious Disease                                                                                                                                                                                                               | Honduras    | Tegucigalpa   | Case report         | 1                 | 3/25/20             | 28        |
| Indraccolo <i>et al.</i>          | Recenti progressi in medicina                                                                                                                                                                                                                        | Italy       | Umbria        | Case report         | 1                 | 25/03/2020          | 29        |
| Liao X <i>et al.</i>              | Balkan Medical Journal                                                                                                                                                                                                                               | China       | Chongqing     | Case report         | 1                 | 3/26/20             | 30        |
| Dong L <i>et al.</i>              | JAMA                                                                                                                                                                                                                                                 | China       | Wuhan         | Case report         | 1                 | 3/26/20             | 48        |
| Zeng L <i>et al.</i>              | JAMA Pediatrics                                                                                                                                                                                                                                      | China       | Wuhan         | Case series         | 6                 | 3/26/20             | 24        |
| Zeng H <i>et al.</i>              | JAMA                                                                                                                                                                                                                                                 | China       | Wuhan         | Case series         | 6                 | 3/26/20             | 25        |
| Lee D <i>et al.</i>               | Korean Journal of Anesthesiology                                                                                                                                                                                                                     | South Korea | Daegu         | Case report         | 1                 | 3/31/20             | 31        |
| Gu Z <i>et al.</i>                | Chinese Family Planning and Obstetrics and Gynecology                                                                                                                                                                                                | China       | Shaanxi       | Case report         | 1                 | 4/1/20              | 32        |
| Huang L <i>et al.</i>             | Revista Médica del Ejército Popular de Liberación                                                                                                                                                                                                    | China       | Wuhan         | Case report         | 1                 | 4/1/20              | 33        |
| Juusela A <i>et al.</i>           | American Journal of Obstetrics & Gynecology MFM                                                                                                                                                                                                      | USA         | New Jersey    | Case series         | 2                 | 03/04/2020          | 19        |
| Gidlöf S <i>et al.</i>            | Acta obstetrica et gynecologica Scandinavica                                                                                                                                                                                                         | Sweden      | Stockholm     | Case report         | 1                 | 06/04/2020          | 34        |
| Kleinwechter <i>et al.</i>        | Der Diabetologe                                                                                                                                                                                                                                      | Germany     | Freiburg      | Case report         | 1                 | 06/04/2020          | 35        |
| Kalafat E <i>et al.</i>           | Ultrasound in Obstetrics & Gynecology                                                                                                                                                                                                                | Turkey      | Ankara        | Case report         | 1                 | 06/04/2020          | 36        |
| Ferrazzi EM <i>et al.</i>         | International Journal of Gynecology & Obstetrics                                                                                                                                                                                                     | Italy       | Milan         | Case series         | 42                | 08/04/2020          | 18        |
| Breslin N <i>et al.</i>           | American Journal of Obstetrics & Gynecology MFM                                                                                                                                                                                                      | USA         | New York      | Case series         | 43                | 09/04/2020          | 17        |
| Xiong X <i>et al.</i>             | Journal of medical virology                                                                                                                                                                                                                          | China       | Beijing       | Case report         | 1                 | 10/04/2020          | 37        |
| Karami P <i>et al.</i>            | Travel medicine and infectious disease                                                                                                                                                                                                               | Iran        | Zanjan        | Case report         | 1                 | 11/04/2020          | 38        |
| Peng Z <i>et al.</i>              | Journal of Infection and Public Health                                                                                                                                                                                                               | China       | Chongqing     | Case report         | 1                 | 11/04/2020          | 39        |
| Schnettler <i>et al.</i>          | American Journal of Obstetrics & Gynecology MFM                                                                                                                                                                                                      | USA         | Ohio          | Case report         | 1                 | 4/14/20             | 40        |
| Lowe B <i>et al.</i>              | Australian and New Zealand Journal of Obstetrics and Gynaecology                                                                                                                                                                                     | Australia   | Southport     | Case report         | 1                 | 4/15/20             | 41        |
| Iqbal SN <i>et al.</i>            | New England Journal of Medicine                                                                                                                                                                                                                      | USA         | Washington    | Case report         | 1                 | 4/16/20             | 42        |
| Gonzales R <i>et al.</i>          | Revista Clínica Española                                                                                                                                                                                                                             | Spain       | Gran Canaria  | Case report         | 1                 | 4/17/20             | 43        |
| Vlachodimitropoulou <i>et al.</i> | Journal of Thrombosis and Haemostasis                                                                                                                                                                                                                | Canada      | Toronto       | Case series         | 2                 | 4/17/20             | 20        |
| Alzamora M <i>et al.</i>          | American Journal of Perinatology                                                                                                                                                                                                                     | Peru        | Lima          | Case report         | 1                 | 18/04/2020          | 44        |
| Sharma <i>et al.</i>              | International Journal of Gynecology & Obstetrics                                                                                                                                                                                                     | India       | New Delhi     | Case report         | 1                 | 4/23/20             | 45        |
| Yan J <i>et al.</i>               | American Journal of Obstetrics and Gynecology                                                                                                                                                                                                        | China       | Wuhan         | Case series         | 65                | 4/23/20             | 22        |
| Browne <i>et al.</i>              | American Journal of Perinatology                                                                                                                                                                                                                     | USA         | West Columbia | Case report         | 1                 | 4/24/20             | 46        |
| Lu D <i>et al.</i>                | Journal of medical virology                                                                                                                                                                                                                          | China       | Hefei         | Case report         | 1                 | 4/24/20             | 47        |
| Vintzileos <i>et al.</i>          | American Journal of Obstetrics & Gynecology                                                                                                                                                                                                          | USA         | New York      | Case series         | 32                | 4/26/20             | 21        |
| Qiancheng X <i>et al.</i>         | International Journal of Infectious Diseases                                                                                                                                                                                                         | China       | Wuhan         | Case-control        | 28                | 4/27/20             | 16        |
| NVOG                              | Dutch Association for Obstetrics and Gynecology<br>Web page: <a href="https://www.nvog.nl/actueel/registratie-van-covid-19-positieve-zwangeren-in-nethoss/">https://www.nvog.nl/actueel/registratie-van-covid-19-positieve-zwangeren-in-nethoss/</a> | Netherlands | -             | Governmental report | 111               | 5/1/20              | 10        |

Table S3a. Quality assessment of case series and case reports with modified Newcastle Ottawa scale

| Author                     | Reference | Question 1 : Did the patient(s) represent the whole case(s) of the medical center? |    | Question 2: Was the diagnosis correctly made? |    | Question 3: Was the other important diagnosis excluded? |    | Question 4: Were all the important data cited in the report? |    | Question 5: Was the outcome correctly ascertained? |    | Puntaje | Methodological quality (a)      |
|----------------------------|-----------|------------------------------------------------------------------------------------|----|-----------------------------------------------|----|---------------------------------------------------------|----|--------------------------------------------------------------|----|----------------------------------------------------|----|---------|---------------------------------|
|                            |           | Yes                                                                                | No | Yes                                           | No | Yes                                                     | No | Yes                                                          | No | Yes                                                | No |         |                                 |
| Wang X <i>et al.</i>       | 26        | Yes                                                                                |    | Yes                                           |    | Yes                                                     |    | Yes                                                          |    | Yes                                                |    | 5       | GOOD                            |
| Wen Q <i>et al.</i>        | 27        | Yes                                                                                |    | Yes                                           |    |                                                         | No | Yes                                                          |    | Yes                                                |    | 4       | MODERATE                        |
| Chen X <i>et al.</i>       | 32        | Yes                                                                                |    | Yes                                           |    |                                                         | No | Yes                                                          |    | Yes                                                |    | 4       | MODERATE                        |
| Zambrano L <i>et al.</i>   | 28        | Yes                                                                                |    | Yes                                           |    |                                                         | No | Yes                                                          |    | Yes                                                |    | 4       | MODERATE                        |
| Indraccolo <i>et al.</i>   | 29        | Yes                                                                                |    | Yes                                           |    |                                                         | No | Yes                                                          |    | Yes                                                |    | 4       | MODERATE                        |
| Liao X <i>et al.</i>       | 30        | Yes                                                                                |    | Yes                                           |    |                                                         | No | Yes                                                          |    | Yes                                                |    | 4       | MODERATE                        |
| Dong L <i>et al.</i>       | 48        | Yes                                                                                |    | Yes                                           |    |                                                         | No | Yes                                                          |    | Yes                                                |    | 4       | MODERATE                        |
| Zeng L <i>et al.</i>       | 24        | Yes                                                                                |    | Yes                                           |    |                                                         | No | Yes                                                          |    | Yes                                                |    | 4       | MODERATE                        |
| Zeng H <i>et al.</i>       | 25        | Yes                                                                                |    | Yes                                           |    |                                                         | No |                                                              | No | Yes                                                |    | 3       | POOR                            |
| Lee D <i>et al.</i>        | 31        | Yes                                                                                |    | Yes                                           |    |                                                         | No | Yes                                                          |    | Yes                                                |    | 4       | MODERATE                        |
| Gu Z <i>et al.</i>         | 32        | Yes                                                                                |    |                                               | No |                                                         | No | Yes                                                          |    | Yes                                                |    | 3       | POOR                            |
| Huang L <i>et al.</i>      | 33        | Yes                                                                                |    |                                               | No |                                                         | No | Yes                                                          |    | Yes                                                |    | 3       | POOR                            |
| Juusela A <i>et al.</i>    | 19        | Yes                                                                                |    | Yes                                           |    |                                                         | No | Yes                                                          |    | Yes                                                |    | 4       | MODERATE                        |
| Gidlöf S <i>et al.</i>     | 34        | Yes                                                                                |    | Yes                                           |    |                                                         | No | Yes                                                          |    | Yes                                                |    | 4       | MODERATE                        |
| Kleinwechter <i>et al.</i> | 35        | Yes                                                                                |    | Yes                                           |    |                                                         | No | Yes                                                          |    | Yes                                                |    | 4       | MODERATE                        |
| Kalafat E <i>et al.</i>    | 36        | Yes                                                                                |    | Yes                                           |    |                                                         | No | Yes                                                          |    | Yes                                                |    | 4       | MODERATE                        |
| Ferrazzi EM <i>et al.</i>  | 18        | Yes                                                                                |    | Yes                                           |    |                                                         | No |                                                              | No | Yes                                                |    | 3       | POOR                            |
| Breslin N <i>et al.</i>    | 17        | Yes                                                                                |    | Yes                                           |    |                                                         | No | Yes                                                          |    | Yes                                                |    | 4       | MODERATE                        |
| Xiong X <i>et al.</i>      | 37        | Yes                                                                                |    | Yes                                           |    |                                                         | No | Yes                                                          |    | Yes                                                |    | 4       | MODERATE                        |
| Karami P <i>et al.</i>     | 38        | Yes                                                                                |    | Yes                                           |    |                                                         | No | Yes                                                          |    | Yes                                                |    | 4       | MODERATE                        |
| Peng Z <i>et al.</i>       | 39        | Yes                                                                                |    | Yes                                           |    |                                                         | No | Yes                                                          |    | Yes                                                |    | 4       | MODERATE                        |
| Schnettler <i>et al.</i>   | 40        | Yes                                                                                |    | Yes                                           |    |                                                         | No | Yes                                                          |    | Yes                                                |    | 4       | MODERATE                        |
| Lowe B <i>et al.</i>       | 41        | Yes                                                                                |    | Yes                                           |    |                                                         | No | Yes                                                          |    | Yes                                                |    | 4       | MODERATE                        |
| Iqbal SN <i>et al.</i>     | 42        | Yes                                                                                |    | Yes                                           |    |                                                         | No | Yes                                                          |    | Yes                                                |    | 4       | MODERATE                        |
| Gonzales R <i>et al.</i>   | 43        | Yes                                                                                |    | Yes                                           |    |                                                         | No | Yes                                                          |    | Yes                                                |    | 4       | MODERATE                        |
| Vlachodimitropoulou        | 20        | Yes                                                                                |    | Yes                                           |    | Yes                                                     |    | Yes                                                          |    | Yes                                                |    | 5       | GOOD                            |
| Alzamora M <i>et al.</i>   | 44        | Yes                                                                                |    | Yes                                           |    |                                                         | No | Yes                                                          |    | Yes                                                |    | 4       | MODERATE                        |
| Sharma <i>et al.</i>       | 45        | Yes                                                                                |    |                                               | No |                                                         | No |                                                              | No | Yes                                                |    | 2       | POOR                            |
| Yan J <i>et al.</i>        | 22        | Yes                                                                                |    | Yes                                           |    |                                                         | No | Yes                                                          |    | Yes                                                |    | 4       | MODERATE                        |
| Browne <i>et al.</i>       | 46        | Yes                                                                                |    | Yes                                           |    | Yes                                                     |    | Yes                                                          |    | Yes                                                |    | 5       | GOOD                            |
| Lu D <i>et al.</i>         | 47        | Yes                                                                                |    | Yes                                           |    |                                                         | No | Yes                                                          |    | Yes                                                |    | 4       | MODERATE                        |
| Vintzileos <i>et al.</i>   | 21        | Yes                                                                                |    | Yes                                           |    |                                                         | No |                                                              | No | Yes                                                |    | 3       | POOR                            |
| <b>Total: 32 studies</b>   |           | 32                                                                                 | 0  | 29                                            | 3  | 3                                                       | 29 | 28                                                           | 4  | 32                                                 | 0  |         | GOOD 3<br>MODERATE 23<br>POOR 6 |

(a) Methodological quality: 5 points (GOOD), 4 points (MODERATE) and 3 points or less (POOR)

Table S3b. Quality assessment of case-control studies with Newcastle Ottawa scale

| Author                    | Reference | Selection                        |                                 |                       |                        | Comparability | Exposure                  |                                                     |                   | Total stars |
|---------------------------|-----------|----------------------------------|---------------------------------|-----------------------|------------------------|---------------|---------------------------|-----------------------------------------------------|-------------------|-------------|
|                           |           | Is the case definition adequate? | Representativeness of the Cases | Selection of Controls | Definition of Controls |               | Ascertainment of exposure | Same method of ascertainment for cases and controls | Non-Response rate |             |
| Li N <i>et al.</i>        | 14        | ★                                | ★                               | ☆                     | ★                      | ★★            | ★                         | ★                                                   | ★                 | 8           |
| Liu H <i>et al.</i>       | 15        | ★                                | ★                               | ☆                     | ★                      | ★☆            | ★                         | ★                                                   | ☆                 | 6           |
| Zhang L <i>et al.</i>     | 13        | ★                                | ★                               | ☆                     | ★                      | ★☆            | ★                         | ★                                                   | ★                 | 7           |
| Qiancheng X <i>et al.</i> | 16        | ★                                | ★                               | ☆                     | ★                      | ★★            | ★                         | ★                                                   | ★                 | 8           |





Table S6. Laboratory and imaging characteristics of pregnant women with COVID-19 infection

| Author                     | Reference | Number of pregnant women | Laboratory   |            |             |                 |                       |                       |                 |                      |        |                         |                |                                         |                |           | CT evidence of pneumonia <sup>a</sup> | Chest CT imaging characteristics |                      |                     |                      |               | Chest Radiography Evidence of pneumonia | Lung ultrasound Evidence of pneumonia |
|----------------------------|-----------|--------------------------|--------------|------------|-------------|-----------------|-----------------------|-----------------------|-----------------|----------------------|--------|-------------------------|----------------|-----------------------------------------|----------------|-----------|---------------------------------------|----------------------------------|----------------------|---------------------|----------------------|---------------|-----------------------------------------|---------------------------------------|
|                            |           |                          | Leucocytosis | Leukopenia | Lymphopenia | Trombocytopenia | High AST <sup>a</sup> | High ALT <sup>b</sup> | High Creatinine | High Creatine kinase | Anemia | High C-reactive protein | High bilirubin | Erythrocyte sedimentation rate elevated | Serum ferritin | High IL-6 |                                       | High IL-10                       | Unilateral pneumonia | Bilateral pneumonia | Ground-glass opacity | Consolidation |                                         |                                       |
| Wang X <i>et al.</i>       | 26        | 1                        | 1            | 0          | 1           | -               | 0                     | 0                     | 0               | -                    | -      | 1                       | -              | -                                       | -              | 1         | 0                                     | 1                                | 1                    | 1                   | 0                    | -             | -                                       |                                       |
| Wen Q <i>et al.</i>        | 27        | 1                        | -            | -          | -           | -               | -                     | -                     | -               | -                    | -      | -                       | -              | -                                       | -              | 1         | 0                                     | 1                                | 1                    | 1                   | 1                    | -             | -                                       |                                       |
| Chen X <i>et al.</i>       | 32        | 3                        | 0            | 0          | 2           | -               | 0                     | 0                     | 0               | -                    | -      | 3                       | -              | -                                       | -              | 3         | 0                                     | 3                                | 3                    | 1                   | 0                    | -             | -                                       |                                       |
| Zambrano L <i>et al.</i>   | 28        | 1                        | 1            | 0          | 0           | 0               | 0                     | 0                     | -               | -                    | -      | -                       | -              | -                                       | -              | -         | -                                     | -                                | -                    | -                   | -                    | -             | -                                       |                                       |
| Indraccolo <i>et al.</i>   | 29        | 1                        | -            | -          | -           | -               | -                     | -                     | -               | -                    | -      | -                       | -              | -                                       | -              | -         | -                                     | -                                | -                    | -                   | -                    | -             | -                                       |                                       |
| Liao X <i>et al.</i>       | 30        | 1                        | 0            | 0          | 1           | -               | -                     | -                     | -               | -                    | -      | -                       | -              | -                                       | -              | 1         | 0                                     | 1                                | 1                    | 1                   | 1                    | -             | -                                       |                                       |
| Lee D <i>et al.</i>        | 31        | 1                        | -            | -          | -           | -               | -                     | -                     | -               | -                    | -      | 0                       | -              | -                                       | -              | 1         | 1                                     | 0                                | 1                    | 0                   | 0                    | -             | -                                       |                                       |
| Gu Z <i>et al.</i>         | 32        | 1                        | -            | -          | -           | -               | -                     | -                     | -               | -                    | -      | -                       | -              | -                                       | -              | -         | 1                                     | 1                                | 0                    | 1                   | 0                    | 0             | -                                       |                                       |
| Huang L <i>et al.</i>      | 33        | 1                        | 0            | 0          | 1           | -               | -                     | -                     | -               | -                    | -      | -                       | -              | -                                       | -              | -         | 1                                     | 0                                | 1                    | 0                   | 1                    | 0             | -                                       |                                       |
| Jusef A <i>et al.</i>      | 19        | 2                        | -            | -          | -           | 0               | 1                     | 1                     | -               | -                    | -      | -                       | -              | -                                       | 0              | -         | -                                     | -                                | -                    | -                   | -                    | 2             | -                                       |                                       |
| Gidiot S <i>et al.</i>     | 34        | 1                        | 0            | 0          | 0           | 0               | 0                     | 0                     | -               | 0                    | 1      | -                       | -              | -                                       | -              | 1         | -                                     | -                                | -                    | -                   | -                    | -             | -                                       |                                       |
| Kleinwechter <i>et al.</i> | 35        | 1                        | 0            | 0          | 1           | 1               | -                     | -                     | -               | 1                    | -      | -                       | -              | -                                       | -              | -         | 1                                     | -                                | -                    | -                   | -                    | -             | -                                       |                                       |
| Kalafat E <i>et al.</i>    | 36        | 1                        | -            | -          | 1           | -               | -                     | -                     | -               | -                    | -      | -                       | -              | -                                       | -              | -         | -                                     | 1                                | 1                    | 1                   | 0                    | 0             | 1                                       |                                       |
| Ferrazzi EM <i>et al.</i>  | 18        | 42                       | -            | -          | -           | -               | -                     | -                     | -               | -                    | -      | -                       | -              | -                                       | -              | -         | -                                     | -                                | -                    | -                   | -                    | -             | -                                       |                                       |
| Breslin N <i>et al.</i>    | 17        | 43                       | -            | -          | -           | -               | -                     | -                     | -               | -                    | -      | -                       | -              | -                                       | -              | -         | -                                     | -                                | -                    | -                   | -                    | -             | -                                       |                                       |
| Kiang X <i>et al.</i>      | 37        | 1                        | 1            | 0          | 0           | -               | 0                     | 0                     | -               | 0                    | -      | 1                       | -              | -                                       | -              | 0         | -                                     | -                                | -                    | -                   | -                    | 1             | -                                       |                                       |
| Karant P <i>et al.</i>     | 38        | 1                        | 0            | 1          | 1           | 1               | 1                     | 1                     | 1               | 1                    | 1      | 1                       | -              | -                                       | -              | -         | 0                                     | 1                                | 1                    | 1                   | 1                    | 1             | -                                       |                                       |
| Peng Z <i>et al.</i>       | 39        | 1                        | -            | -          | -           | -               | -                     | -                     | -               | -                    | -      | -                       | -              | -                                       | -              | -         | 1                                     | 0                                | 1                    | 1                   | 1                    | 0             | -                                       |                                       |
| Schnettler <i>et al.</i>   | 40        | 1                        | 0            | 0          | 1           | -               | -                     | -                     | -               | -                    | -      | -                       | -              | -                                       | -              | 1         | 0                                     | 1                                | 1                    | 1                   | 0                    | 1             | 1                                       |                                       |
| Lowe B <i>et al.</i>       | 41        | 1                        | -            | -          | -           | -               | -                     | -                     | -               | -                    | -      | -                       | -              | -                                       | -              | -         | -                                     | -                                | -                    | -                   | -                    | -             | -                                       |                                       |
| Iqbal SN <i>et al.</i>     | 42        | 1                        | 0            | 0          | 1           | 0               | 0                     | 1                     | 0               | -                    | 1      | 0                       | -              | -                                       | -              | -         | -                                     | -                                | -                    | -                   | -                    | 1             | -                                       |                                       |
| Gonzales R <i>et al.</i>   | 43        | 1                        | 1            | 0          | 1           | -               | -                     | -                     | -               | -                    | -      | 1                       | -              | -                                       | -              | -         | -                                     | -                                | -                    | -                   | -                    | 1             | -                                       |                                       |
| Vlachodimitropoulou e      | 20        | 2                        | 0            | 1          | 2           | 2               | 2                     | 1                     | -               | 1                    | 0      | 2                       | 0              | -                                       | -              | 2         | -                                     | -                                | -                    | -                   | -                    | 0             | -                                       |                                       |
| Alzamor M <i>et al.</i>    | 44        | 1                        | 0            | 1          | 1           | 1               | -                     | -                     | -               | -                    | 1      | 1                       | -              | -                                       | 1              | -         | 1                                     | 0                                | 1                    | 0                   | 1                    | 1             | -                                       |                                       |
| Sharma <i>et al.</i>       | 45        | 1                        | -            | -          | -           | -               | -                     | -                     | -               | -                    | -      | -                       | -              | -                                       | -              | -         | -                                     | -                                | -                    | -                   | -                    | -             | -                                       |                                       |
| Yan J <i>et al.</i>        | 22        | 65                       | 3            | 20         | 38          | -               | 3                     | 4                     | 0               | -                    | -      | 32                      | -              | -                                       | -              | -         | -                                     | -                                | 53                   | -                   | -                    | -             | -                                       |                                       |
| Browne <i>et al.</i>       | 46        | 1                        | 1            | 0          | 0           | 0               | -                     | -                     | -               | -                    | -      | -                       | -              | -                                       | -              | 61        | -                                     | -                                | -                    | -                   | -                    | -             | -                                       |                                       |
| Lu D <i>et al.</i>         | 47        | 1                        | 1            | 0          | 1           | 0               | 0                     | 0                     | 0               | 0                    | 1      | 1                       | 0              | -                                       | -              | -         | 1                                     | 0                                | 1                    | 0                   | 0                    | 1             | -                                       |                                       |
| Vintzileos <i>et al.</i>   | 21        | 32                       | -            | -          | -           | -               | -                     | -                     | -               | -                    | -      | -                       | -              | -                                       | -              | -         | -                                     | -                                | -                    | -                   | -                    | -             | -                                       |                                       |
| NVOG                       | 10        | 111                      | -            | -          | -           | -               | -                     | -                     | -               | -                    | -      | -                       | -              | -                                       | -              | -         | -                                     | -                                | -                    | -                   | -                    | -             | -                                       |                                       |

<sup>a</sup> AST: Alanine aminotransferase; <sup>b</sup> ALT: Aspartate aminotransferase; c CT: Computed tomography

Table S7. Maternal outcomes of the pregnant women with COVID-19 infection

| Author                     | Reference | Number of pregnant women | Obstetric complications |                     |                       |            |                           |                |                    | Delivered |         | Pregnancy ongoing | Termination of pregnancy | Spontaneous abortion |
|----------------------------|-----------|--------------------------|-------------------------|---------------------|-----------------------|------------|---------------------------|----------------|--------------------|-----------|---------|-------------------|--------------------------|----------------------|
|                            |           |                          | PROM <sup>a</sup>       | Placental abruption | Intrauterine distress | Stillbirth | Threat of premature labor | Preterm labour | Premature delivery | C-section | Vaginal |                   |                          |                      |
| Wang X <i>et al.</i>       | 26        | 1                        | 0                       | 0                   | 1                     | 0          | 0                         | 0              | 1                  | 1         | 0       | 0                 | 0                        | 0                    |
| Wen Q <i>et al.</i>        | 27        | 1                        | 0                       | 0                   | 0                     | 0          | 0                         | 0              | 0                  | 0         | 0       | 1                 | 0                        | 0                    |
| Chen X <i>et al.</i>       | 32        | 3                        | 0                       | 0                   | 1                     | 0          | 0                         | 0              | 1                  | 1         | 0       | 1                 | 1                        | 0                    |
| Zambrano L <i>et al.</i>   | 28        | 1                        | 0                       | 0                   | 0                     | 0          | 0                         | 1              | 1                  | 0         | 1       | 0                 | 0                        | 0                    |
| Indraccolo <i>et al.</i>   | 29        | 1                        | 0                       | 0                   | 0                     | 0          | 0                         | 0              | 0                  | NA        | NA      | 1                 | 0                        | 0                    |
| Liao X <i>et al.</i>       | 30        | 1                        | 0                       | 0                   | 1                     | 0          | 0                         | 0              | 1                  | 1         | 0       | 0                 | 0                        | 0                    |
| Lee D <i>et al.</i>        | 31        | 1                        | 0                       | 0                   | 0                     | 0          | 0                         | 0              | 0                  | 1         | 0       | 0                 | 0                        | 0                    |
| Gu Z <i>et al.</i>         | 32        | 1                        | 0                       | 0                   | 1                     | 0          | 0                         | 0              | 1                  | 1         | 0       | 0                 | 0                        | 0                    |
| Huang L <i>et al.</i>      | 33        | 1                        | 0                       | 0                   | 0                     | 0          | 0                         | 0              | 1                  | 1         | 0       | 0                 | 0                        | 0                    |
| Juusela A <i>et al.</i>    | 19        | 2                        | 0                       | 0                   | 0                     | 0          | 0                         | 0              | 1                  | 2         | 0       | 0                 | 0                        | 0                    |
| Gidlöf S <i>et al.</i>     | 34        | 1                        | 0                       | 0                   | 0                     | 0          | 0                         | 0              | 1                  | 1         | 0       | 0                 | 0                        | 0                    |
| Kleinwechter <i>et al.</i> | 35        | 1                        | 0                       | 0                   | 0                     | 0          | 1                         | 0              | 0                  | NA        | NA      | 1                 | 0                        | 0                    |
| Kalafat E <i>et al.</i>    | 36        | 1                        | 0                       | 0                   | 0                     | 0          | 0                         | 0              | 1                  | 1         | 0       | 0                 | 0                        | 0                    |
| Ferrazzi EM <i>et al.</i>  | 18        | 42                       | -                       | -                   | -                     | 0          | 0                         | 2              | 2                  | 18        | 24      | 0                 | 0                        | 0                    |
| Breslin N <i>et al.</i>    | 17        | 43                       | 1                       | -                   | -                     | 0          | 0                         | 1              | 1                  | 8         | 10      | 25                | 0                        | 0                    |
| Xiong X <i>et al.</i>      | 37        | 1                        | 1                       | 0                   | 0                     | 0          | 0                         | 0              | 0                  | 0         | 1       | 0                 | 0                        | 0                    |
| Karami P <i>et al.</i>     | 38        | 1                        | 0                       | 0                   | 0                     | 1          | 0                         | 1              | 1                  | 0         | 1       | 0                 | 0                        | 0                    |
| Peng Z <i>et al.</i>       | 39        | 1                        | 0                       | 0                   | 1                     | 0          | 0                         | 0              | 1                  | 1         | 0       | 0                 | 0                        | 0                    |
| Schnettler <i>et al.</i>   | 40        | 1                        | 0                       | 0                   | 1                     | 0          | 1                         | 0              | 1                  | 1         | 0       | 0                 | 0                        | 0                    |
| Lowe B <i>et al.</i>       | 41        | 1                        | 0                       | 0                   | 0                     | 0          | 0                         | 0              | 0                  | 0         | 1       | 0                 | 0                        | 0                    |
| Iqbal SN <i>et al.</i>     | 42        | 1                        | 0                       | 0                   | 0                     | 0          | 0                         | 0              | 0                  | 0         | 1       | 0                 | 0                        | 0                    |
| Gonzales R <i>et al.</i>   | 43        | 1                        | 0                       | 0                   | 0                     | 0          | 0                         | 0              | 1                  | 1         | 0       | 0                 | 0                        | 0                    |
| Vlachodimitropoulou        | 20        | 2                        | 0                       | 0                   | 2                     | 0          | 0                         | 0              | 2                  | 2         | 0       | 0                 | 0                        | 0                    |
| Alzamora M <i>et al.</i>   | 44        | 1                        | 0                       | 0                   | 0                     | 0          | 0                         | 0              | 1                  | 1         | 0       | 0                 | 0                        | 0                    |
| Sharma <i>et al.</i>       | 45        | 1                        | 0                       | 0                   | 0                     | 0          | 0                         | 0              | 0                  | 1         | 0       | 0                 | 0                        | 0                    |
| Yan J <i>et al.</i>        | 22        | 65                       | 3                       | 0                   | 7                     | 0          | 0                         | 3              | 16                 | 44        | 6       | 14                | 0                        | 1                    |
| Browne <i>et al.</i>       | 46        | 1                        | 0                       | 0                   | 0                     | 0          | 1                         | 0              | 0                  | NA        | NA      | 1                 | 0                        | 0                    |
| Lu D <i>et al.</i>         | 47        | 1                        | 0                       | 0                   | 0                     | 0          | 0                         | 0              | 0                  | 1         | 0       | 0                 | 0                        | 0                    |
| Vintzileos <i>et al.</i>   | 21        | 32                       | -                       | -                   | -                     | -          | -                         | -              | -                  | -         | -       | 0                 | 0                        | 0                    |
| NVOG                       | 10        | 111                      | -                       | 0                   | 2                     | 0          | 2                         | 1              | 1                  | 11        | 19      | 81                | 0                        | 0                    |

a PROM: Premature rupture of membranes

Table S8. Medical complications and treatment of the pregnant women with COVID-19 infection

| Author                            | Reference | Number of pregnant women | Severe pneumonia | Acute respiratory distress | Acute hepatic failure | Acute renal failure | Coagulopathy | Cardiomyopathy | Septic shock | ICU admission <sup>a</sup> | Maternal treatment |                |                     |                    |                       |                      |                           |                        |                |                   | Maternal mortality |
|-----------------------------------|-----------|--------------------------|------------------|----------------------------|-----------------------|---------------------|--------------|----------------|--------------|----------------------------|--------------------|----------------|---------------------|--------------------|-----------------------|----------------------|---------------------------|------------------------|----------------|-------------------|--------------------|
|                                   |           |                          |                  |                            |                       |                     |              |                |              |                            | No treatment       | Oxygen support | Antiviral treatment | Antibiotic therapy | Use of corticosteroid | Use of gammaglobulin | Use of hydroxychloroquine | Mechanical ventilation | Prone position | ECMO <sup>b</sup> |                    |
| Wang X <i>et al.</i>              | 26        | 1                        | 1                | 1                          | 0                     | 0                   | 0            | 0              | 0            | 1                          | 0                  | 1              | 1                   | 1                  | 1                     | 0                    | 0                         | 1                      | -              | 0                 | 0                  |
| Wen Q <i>et al.</i>               | 27        | 1                        | 0                | 0                          | 0                     | 0                   | 0            | 0              | 0            | 0                          | 0                  | 1              | 1                   | 0                  | 0                     | 0                    | 0                         | 0                      | -              | 0                 | 0                  |
| Chen X <i>et al.</i>              | 32        | 3                        | 0                | 0                          | 0                     | 0                   | 0            | 0              | 0            | 0                          | 0                  | 3              | 3                   | 0                  | 2                     | 1                    | 0                         | 0                      | -              | 0                 | 0                  |
| Zambrano L <i>et al.</i>          | 28        | 1                        | 0                | 0                          | 0                     | 0                   | 0            | 0              | 0            | 0                          | 0                  | 0              | 0                   | 1                  | 0                     | 0                    | 1                         | 0                      | -              | 0                 | 0                  |
| Indraccolo <i>et al.</i>          | 29        | 1                        | 0                | 0                          | 0                     | 0                   | 0            | 0              | 0            | 0                          | 1                  | 0              | 0                   | 0                  | 0                     | 0                    | 0                         | 0                      | -              | 0                 | 0                  |
| Liao X <i>et al.</i>              | 30        | 1                        | 0                | 0                          | 0                     | 0                   | 0            | 0              | 0            | 0                          | 0                  | 0              | 1                   | 1                  | 1                     | 0                    | 0                         | 0                      | -              | 0                 | 0                  |
| Lee D <i>et al.</i>               | 31        | 1                        | 0                | 0                          | 0                     | 0                   | 0            | 0              | 0            | 0                          | 1                  | 0              | 0                   | 0                  | 0                     | 0                    | 0                         | 0                      | -              | 0                 | 0                  |
| Gu Z <i>et al.</i>                | 32        | 1                        | 0                | 0                          | 0                     | 0                   | 0            | 0              | 0            | 0                          | 0                  | 0              | 1                   | 0                  | 0                     | 0                    | 0                         | 0                      | -              | 0                 | 0                  |
| Huang L <i>et al.</i>             | 33        | 1                        | 1                | 1                          | 0                     | 0                   | 0            | 0              | 0            | 1                          | 0                  | 1              | 1                   | 1                  | 1                     | 1                    | 0                         | 0                      | -              | 0                 | 0                  |
| Juusela A <i>et al.</i>           | 19        | 2                        | 2                | 2                          | 0                     | 0                   | 0            | 2              | 0            | 2                          | 0                  | 2              | 1                   | 1                  | 1                     | 0                    | 1                         | 1                      | -              | 0                 | 0                  |
| Gidlöf S <i>et al.</i>            | 34        | 1                        | 0                | 0                          | 0                     | 0                   | 0            | 0              | 0            | 0                          | 0                  | 1              | 0                   | 0                  | 0                     | 0                    | 0                         | 0                      | -              | 0                 | 0                  |
| Kleinwechter <i>et al.</i>        | 35        | 1                        | 0                | 0                          | 0                     | 0                   | 0            | 0              | 0            | 0                          | 0                  | 1              | 0                   | 0                  | 0                     | 0                    | 0                         | 0                      | -              | 0                 | 0                  |
| Kalafat E <i>et al.</i>           | 36        | 1                        | 1                | 1                          | 0                     | 0                   | 0            | 0              | 0            | 1                          | 0                  | 1              | 1                   | 1                  | 1                     | 0                    | 1                         | 1                      | -              | 0                 | 0                  |
| Ferrazzi EM <i>et al.</i>         | 18        | 42                       | 7                | 7                          | 0                     | 0                   | 0            | 0              | 0            | 7                          | -                  | 7              | -                   | -                  | -                     | -                    | 0                         | -                      | -              | 0                 | 0                  |
| Breslin N <i>et al.</i>           | 17        | 43                       | 2                | 2                          | 0                     | 1                   | 0            | 0              | 0            | 2                          | 35                 | 3              | 0                   | 3                  | 0                     | 0                    | 2                         | 0                      | -              | 0                 | 0                  |
| Xiong X <i>et al.</i>             | 37        | 1                        | 0                | 0                          | 0                     | 0                   | 0            | 0              | 0            | 0                          | 0                  | 0              | 1                   | 1                  | 1                     | 0                    | 0                         | 0                      | -              | 0                 | 0                  |
| Karami P <i>et al.</i>            | 38        | 1                        | 1                | 1                          | 1                     | 1                   | 1            | 0              | 1            | 1                          | 0                  | 1              | 1                   | 1                  | 1                     | 0                    | 1                         | 1                      | -              | 0                 | 1                  |
| Peng Z <i>et al.</i>              | 39        | 1                        | 0                | 0                          | 0                     | 0                   | 0            | 0              | 0            | 0                          | 0                  | 1              | 1                   | 1                  | 0                     | 0                    | 0                         | 0                      | -              | 0                 | 0                  |
| Schnettler <i>et al.</i>          | 40        | 1                        | 1                | 1                          | 0                     | 0                   | 0            | 0              | 1            | 1                          | 0                  | 1              | 1                   | 1                  | 0                     | 0                    | 1                         | 1                      | -              | 0                 | 0                  |
| Lowe B <i>et al.</i>              | 41        | 1                        | 0                | 0                          | 0                     | 0                   | 0            | 0              | 0            | 0                          | 0                  | 0              | 0                   | 1                  | 0                     | 0                    | 0                         | 0                      | -              | 0                 | 0                  |
| Iqbal SN <i>et al.</i>            | 42        | 1                        | 0                | 0                          | 0                     | 0                   | 0            | 0              | 0            | 0                          | 1                  | 0              | 0                   | 0                  | 0                     | 0                    | 0                         | 0                      | -              | 0                 | 0                  |
| Gonzales R <i>et al.</i>          | 43        | 1                        | 1                | 1                          | 0                     | 0                   | 0            | 0              | 0            | 1                          | 0                  | 1              | 1                   | 1                  | 0                     | 0                    | 1                         | 1                      | -              | 0                 | 0                  |
| Vlachodimitropoulou <i>et al.</i> | 20        | 2                        | 0                | 0                          | 0                     | 0                   | 2            | 0              | 0            | 0                          | 0                  | 2              | 0                   | 1                  | 0                     | 0                    | 0                         | 0                      | -              | 0                 | 0                  |
| Alzamora M <i>et al.</i>          | 44        | 1                        | 1                | 1                          | 0                     | 0                   | 0            | 0              | 0            | 1                          | 0                  | 1              | 1                   | 1                  | 0                     | 0                    | 1                         | 1                      | -              | 0                 | 0                  |
| Sharma <i>et al.</i>              | 45        | 1                        | 0                | 0                          | 0                     | 0                   | 0            | 0              | 0            | 0                          | 1                  | 0              | 0                   | 0                  | 0                     | 0                    | 0                         | 0                      | -              | 0                 | 0                  |
| Yan J <i>et al.</i>               | 22        | 65                       | 6                | 1                          | 0                     | 0                   | 0            | 1              | 6            | 6                          | -                  | 6              | 48                  | 58                 | 26                    | 0                    | 0                         | 2                      | -              | 1                 | 0                  |
| Browne <i>et al.</i>              | 46        | 1                        | 0                | 0                          | 0                     | 0                   | 0            | 0              | 0            | 0                          | 0                  | 0              | 0                   | 1                  | 0                     | 0                    | 0                         | 0                      | -              | 0                 | 0                  |
| Lu D <i>et al.</i>                | 47        | 1                        | 0                | 0                          | 0                     | 0                   | 0            | 0              | 0            | 0                          | 0                  | 1              | 1                   | 1                  | 0                     | 0                    | 0                         | 0                      | -              | 0                 | 0                  |
| Vintzileos <i>et al.</i>          | 21        | 32                       | -                | -                          | -                     | -                   | -            | -              | -            | -                          | -                  | -              | -                   | -                  | -                     | -                    | -                         | -                      | -              | -                 | 0                  |
| NVOG                              | 10        | 111                      | -                | -                          | -                     | -                   | -            | -              | -            | 6                          | 90                 | 17             | 2                   | 20                 | 5                     | 0                    | 4                         | 2                      | -              | 0                 | 0                  |

a ICU: Intensive Care Unit; b ECMO: Extracorporeal Membrane Oxygenation

Table S9. Neonatal outcomes

| Author                     | Reference | Number of pregnant women | Number of deliveries | APGAR >7   |               |             |           |          |           |    | Breastfeeding | Asphyxia | Sepsis | Pneumonia | Chorioamnionitis | Meconium stained | Low birth weight | Respiratory distress syndrome | Mechanical ventilation | ICU admission for treatment <sup>a</sup> | Neonatal death | Discharge from hospital |
|----------------------------|-----------|--------------------------|----------------------|------------|---------------|-------------|-----------|----------|-----------|----|---------------|----------|--------|-----------|------------------|------------------|------------------|-------------------------------|------------------------|------------------------------------------|----------------|-------------------------|
|                            |           |                          |                      | < 28 weeks | 29 - 32 weeks | 33-36 weeks | >37 weeks | 1 minute | 5 minutes |    |               |          |        |           |                  |                  |                  |                               |                        |                                          |                |                         |
| Wang X <i>et al.</i>       | 26        | 1                        | 1                    | 0          | 1             | 0           | 0         | 1        | 1         | 0  | 0             | 0        | 0      | 0         | 0                | 1                | 0                | 0                             | 1                      | 0                                        | -              |                         |
| Wen Q <i>et al.</i>        | 27        | 1                        | 0                    | NA         | NA            | NA          | NA        | NA       | NA        | NA | NA            | NA       | NA     | NA        | NA               | NA               | NA               | NA                            | NA                     | NA                                       | NA             |                         |
| Chen X <i>et al.</i>       | 32        | 3                        | 1                    | 0          | 0             | 1           | 0         | 1        | 1         | 0  | 0             | 0        | 0      | 0         | 0                | 0                | 0                | 0                             | 0                      | 0                                        | 1              |                         |
| Zambrano L <i>et al.</i>   | 28        | 1                        | 1                    | 0          | 0             | 1           | 0         | 1        | 1         | 0  | 0             | 0        | 0      | 0         | 0                | 1                | 0                | 0                             | 0                      | 0                                        | 1              |                         |
| Indraccolo <i>et al.</i>   | 29        | 1                        | 0                    | NA         | NA            | NA          | NA        | NA       | NA        | NA | NA            | NA       | NA     | NA        | NA               | NA               | NA               | NA                            | NA                     | NA                                       | NA             |                         |
| Liao X <i>et al.</i>       | 30        | 1                        | 1                    | 0          | 0             | 1           | 0         | -        | -         | -  | -             | -        | -      | -         | -                | -                | -                | -                             | -                      | 0                                        | -              |                         |
| Lee D <i>et al.</i>        | 31        | 1                        | 1                    | 0          | 0             | 0           | 1         | 1        | 1         | 0  | 0             | 0        | 1      | 0         | 0                | 0                | 0                | 0                             | 0                      | 0                                        | 1              |                         |
| Gu Z <i>et al.</i>         | 32        | 1                        | 1                    | 0          | 0             | 1           | 0         | 1        | 1         | 0  | 0             | 0        | 0      | 0         | 0                | 0                | 0                | 0                             | 0                      | 0                                        | 1              |                         |
| Huang L <i>et al.</i>      | 33        | 1                        | 1                    | 0          | 0             | 1           | 0         | 1        | 1         | 0  | 0             | 0        | 0      | 0         | 0                | 0                | 0                | 0                             | 0                      | 0                                        | 1              |                         |
| Juusela A <i>et al.</i>    | 19        | 2                        | 2                    | 0          | 0             | 1           | 1         | -        | -         | -  | -             | -        | -      | -         | -                | -                | -                | -                             | -                      | -                                        | -              |                         |
| Gidiöf S <i>et al.</i>     | 34        | 1                        | 2                    | 0          | 0             | 2           | 0         | 2        | 2         | 2  | 0             | 0        | 0      | 0         | 0                | 1                | 0                | 0                             | 0                      | 0                                        | -              |                         |
| Kleinwechter <i>et al.</i> | 35        | 1                        | 0                    | NA         | NA            | NA          | NA        | NA       | NA        | NA | NA            | NA       | NA     | NA        | NA               | NA               | NA               | NA                            | NA                     | NA                                       | NA             |                         |
| Kalafat E <i>et al.</i>    | 36        | 1                        | 1                    | 0          | 0             | 1           | 0         | 1        | 1         | 1  | 0             | 0        | 0      | 0         | 0                | 0                | 0                | 0                             | 0                      | 0                                        | -              |                         |
| Ferrazzi EM <i>et al.</i>  | 18        | 42                       | 42                   | 0          | 0             | 2           | 40        | -        | -         | 35 | -             | -        | -      | -         | -                | -                | -                | -                             | -                      | -                                        | -              |                         |
| Breslin N <i>et al.</i>    | 17        | 43                       | 18                   | 0          | 0             | 1           | 17        | 18       | 18        | 18 | 0             | 0        | 0      | 0         | 0                | 1                | 1                | 0                             | 3                      | 0                                        | 18             |                         |
| Xiong X <i>et al.</i>      | 37        | 1                        | 1                    | 0          | 0             | 0           | 1         | 1        | 1         | 1  | 0             | 0        | 0      | 0         | 0                | 0                | 0                | 0                             | 0                      | 0                                        | -              |                         |
| Karami P <i>et al.</i>     | 38        | 1                        | 1                    | 0          | 1             | 0           | 0         | 0        | 0         | NA | NA            | NA       | NA     | NA        | NA               | 1                | NA               | NA                            | NA                     | NA                                       | NA             |                         |
| Peng Z <i>et al.</i>       | 39        | 1                        | 1                    | 0          | 0             | 1           | 0         | 1        | 1         | 0  | 0             | 0        | 0      | 0         | 0                | 0                | 1                | 0                             | 1                      | 0                                        | 1              |                         |
| Schnettler <i>et al.</i>   | 40        | 1                        | 1                    | 0          | 1             | 0           | 0         | -        | -         | 0  | 0             | 0        | 0      | 0         | 0                | 1                | 0                | 1                             | 1                      | 0                                        | 0              |                         |
| Lowe B <i>et al.</i>       | 41        | 1                        | 1                    | 0          | 0             | 0           | 1         | 1        | 1         | 1  | 0             | 0        | 0      | 0         | 0                | 0                | 0                | 0                             | 0                      | 0                                        | 1              |                         |
| Iqbal SN <i>et al.</i>     | 42        | 1                        | 1                    | 0          | 0             | 0           | 1         | 1        | 1         | 0  | 0             | 0        | 0      | 0         | 0                | 0                | 0                | 0                             | 0                      | 0                                        | 1              |                         |
| Gonzales R <i>et al.</i>   | 43        | 1                        | 1                    | 0          | 1             | 0           | 0         | -        | -         | -  | -             | -        | -      | -         | -                | -                | -                | -                             | -                      | 0                                        | -              |                         |
| Vlachodimitropoulou        | 20        | 2                        | 2                    | 0          | 0             | 2           | 0         | 1        | 1         | 1  | 1             | -        | 0      | 0         | 0                | 2                | -                | -                             | -                      | 0                                        | 1              |                         |
| Alzamora M <i>et al.</i>   | 44        | 1                        | 1                    | 0          | 0             | 1           | 0         | 0        | 1         | 0  | 0             | 0        | 0      | 0         | 0                | 1                | 0                | 1                             | 1                      | 0                                        | 1              |                         |
| Sharma <i>et al.</i>       | 45        | 1                        | 1                    | 0          | 0             | 0           | 1         | 1        | 1         | 1  | 0             | 0        | 0      | 0         | 0                | 0                | 0                | 0                             | 0                      | 0                                        | 1              |                         |
| Yan J <i>et al.</i>        | 22        | 65                       | 50                   | 0          | 1             | 15          | 34        | 50       | 50        | -  | 1             | -        | -      | -         | -                | -                | -                | -                             | 17                     | 1                                        | 36             |                         |
| Browne <i>et al.</i>       | 46        | 1                        | 0                    | NA         | NA            | NA          | NA        | NA       | NA        | NA | NA            | NA       | NA     | NA        | NA               | NA               | NA               | NA                            | NA                     | NA                                       | NA             |                         |
| Lu D <i>et al.</i>         | 47        | 1                        | 1                    | 0          | 0             | 0           | 1         | 1        | 1         | 0  | 0             | 0        | 0      | 0         | 0                | 0                | 0                | 0                             | 0                      | 0                                        | 1              |                         |
| Vintzileos <i>et al.</i>   | 21        | 32                       | 32                   | -          | -             | -           | -         | -        | -         | -  | -             | -        | -      | -         | -                | -                | -                | -                             | -                      | -                                        | -              |                         |
| NVOG                       | 10        | 111                      | 30                   | -          | -             | -           | -         | -        | -         | 21 | -             | -        | -      | -         | -                | -                | -                | -                             | 0                      | 0                                        | 21             |                         |

a NICU: Neonatal intensive care unit

**Table S10. Characteristics of neonates SARS-CoV-2 positive**

| Characteristics                      | Zeng L <i>et al</i> <sup>13</sup> |              |              | Alzamora <i>et al</i> <sup>44</sup> |
|--------------------------------------|-----------------------------------|--------------|--------------|-------------------------------------|
|                                      | Neonate 1                         | Neonate 2    | Neonate 3    | Neonate 4                           |
| Gestational age in weeks and days    | 40                                | 40 +4        | 31 + 2       | 33                                  |
| Mode of delivery                     | C-section                         | C-section    | C-section    | C-section                           |
| Birthweight in grams                 | 3250                              | 3360         | 1580         | 2970                                |
| Asphyxia                             | No                                | No           | Yes          | No                                  |
| <b>Symptoms and complications</b>    |                                   |              |              |                                     |
| Fever                                | Yes                               | Yes          | No           | No                                  |
| Pneumonia                            | Yes                               | Yes          | Yes          | No                                  |
| Respiratory distress syndrome        | No                                | No           | Yes          | No                                  |
| Shortness of breath                  | No                                | No           | Yes          | Yes                                 |
| Cyanosis                             | No                                | No           | Yes          | No                                  |
| Feeding intolerance                  | No                                | No           | Yes          | No                                  |
| <b>Treatment</b>                     |                                   |              |              |                                     |
| Mechanical ventilation               | No                                | No           | Yes          | Yes                                 |
| Antibiotics                          | No                                | No           | Yes          | No                                  |
| Days in ICU <sup>a</sup>             | 2                                 | 4            | 11           | 0.5                                 |
| Death                                | No                                | No           | No           | No                                  |
| Days after birth tested              | 2 and 4 days                      | 2 and 4 days | 2 and 4 days | 16 hours and 2 days                 |
| Day at negativization                | Day 6                             | Day 6        | Day 7        | Not reported                        |
| a NICU: Neonatal intensive care unit |                                   |              |              |                                     |
